# Supplementary material
Source: Springer Nature journal article supplement (https://www.springermedizin.de/resource/supplementary/12916_2006_83_MOESM1_ESM.pdf/9599132)
Supplement: MOESM1 [file 9599132]

Actor-oriented  
competition

Public-oriented  
competition

1  
Basic science:  
Normal scientific  
rationality

2  
Applied science:  
Technological rationality

3  
Paradigm conflict:  
Philosophical rationality

4  
Paradigm conflict:  
Political rationality

Parallel  
competition

Counter-  
competition
